# Supplementary material for: Egg survival is reduced by grave-soil microbes in the carrion beetle, Nicrophorus vespilloides
Source: PubMed Central journal article supplement (PMC4189599; doi:10.1186/s12862-014-0208-x), 2014-09-27

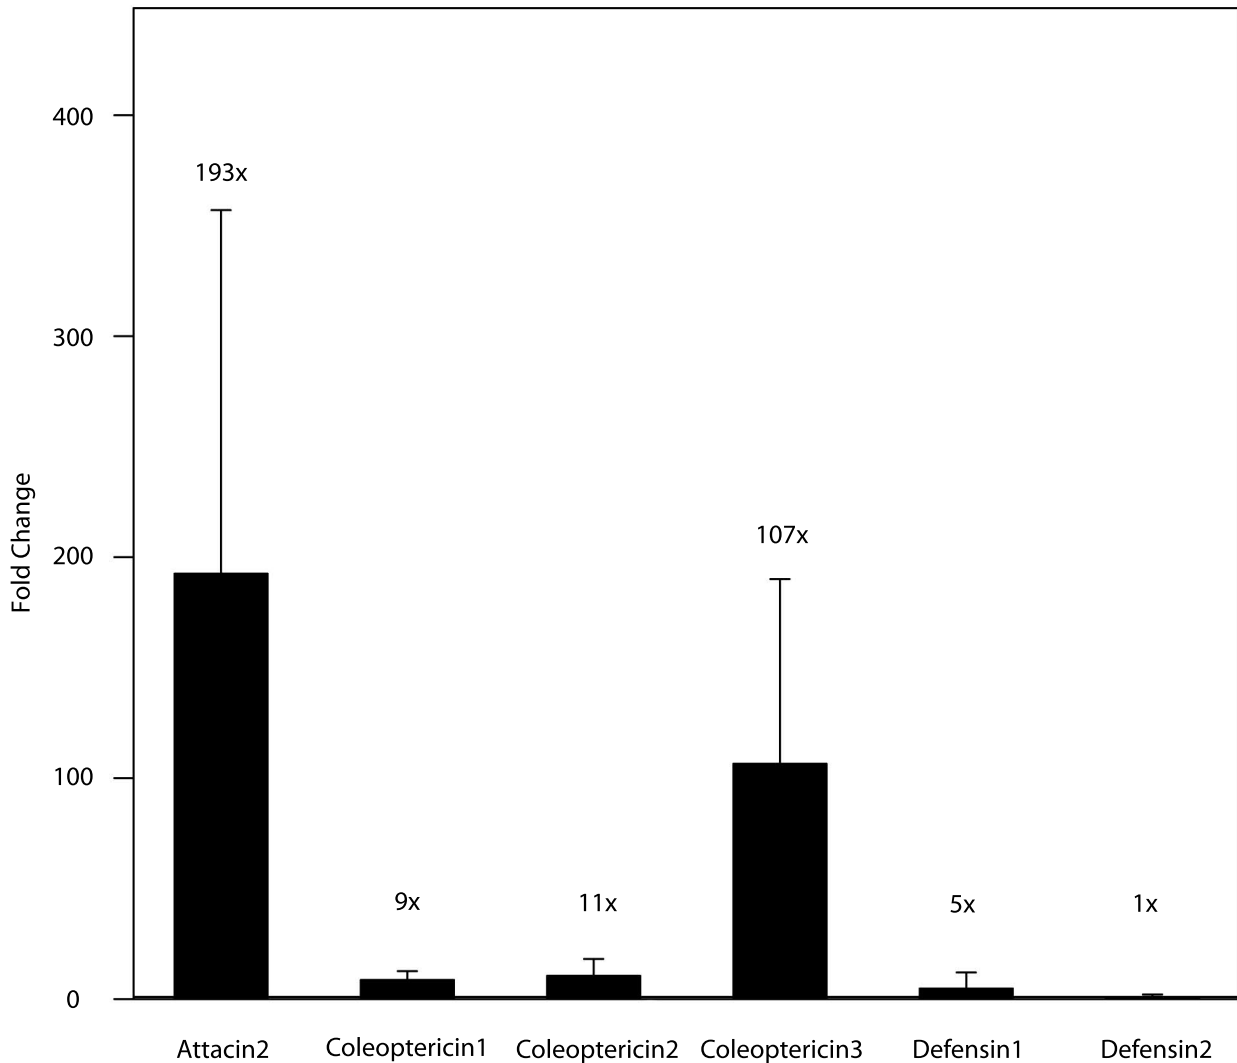

Supplement: 12862_2014_208_MOESM1_ESM.pdf [file 12862_2014_208_MOESM1_ESM.pdf]
